# Supplementary material
Source: PubMed Central journal article supplement (PMC2823404)

**Supplementary:**

**Figure 1. Control experiment of the A-beta oligomeric and conformational state bound to the sensor chip in SPR.**

A) Thioflavin T fluorescence time course upon dissolution of A-beta at pH 4.0 buffer

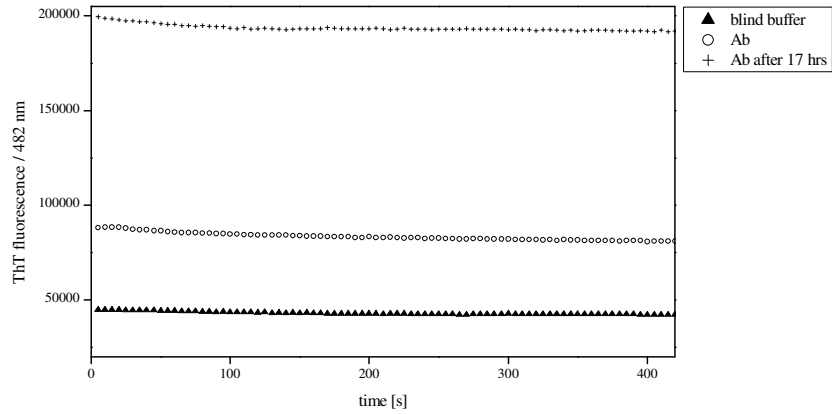

B) TEM images taken at 5 minutes after dissolution

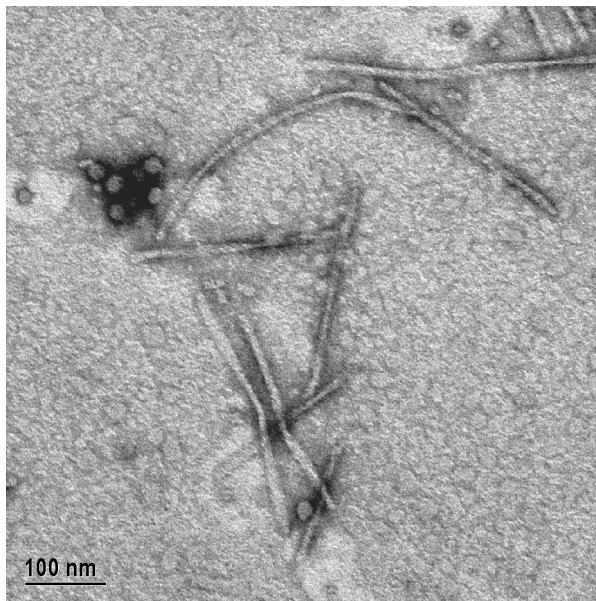

Supplement: supp_M109.024620_Supplementary.pdf [file supp_M109.024620_Supplementary.pdf]
